# Supplementary material
Source: PubMed Central journal article supplement (PMC10539478)

| <b>Supplemental Table 1. Percentage of cases displaying tau positive neurons in the entorhinal-hippocampal complex</b> |           |            |            |            |            |           |           |
|------------------------------------------------------------------------------------------------------------------------|-----------|------------|------------|------------|------------|-----------|-----------|
| <b>Oligomeric tau TOC1</b>                                                                                             | <b>EC</b> | <b>Sub</b> | <b>CA1</b> | <b>CA2</b> | <b>CA3</b> | <b>PI</b> | <b>GI</b> |
| <b>NCI</b>                                                                                                             | 89        | 75         | 92         | 82         | 46         | 75        | 67        |
| <b>MCI</b>                                                                                                             | 100       | 100        | 100        | 100        | 83         | 67        | 67        |
| <b>AD</b>                                                                                                              | 100       | 100        | 100        | 100        | 81         | 67        | 100       |
| <b>Oligomeric tau TNT1</b>                                                                                             | <b>EC</b> | <b>Sub</b> | <b>CA1</b> | <b>CA2</b> | <b>CA3</b> | <b>PI</b> | <b>GI</b> |
| <b>NCI</b>                                                                                                             | 88        | 61         | 92         | 80         | 70         | 60        | 67        |
| <b>MCI</b>                                                                                                             | 100       | 83         | 83         | 80         | 83         | 100       | 67        |
| <b>AD</b>                                                                                                              | 100       | 100        | 100        | 100        | 100        | 89        | 100       |
| <b>Phosphorylated tau AT8</b>                                                                                          | <b>EC</b> | <b>Sub</b> | <b>CA1</b> | <b>CA2</b> | <b>CA3</b> | <b>PI</b> | <b>GI</b> |
| <b>NCI</b>                                                                                                             | 100       | 92         | 100        | 91         | 66         | 92        | 69        |
| <b>MCI</b>                                                                                                             | 100       | 83         | 100        | 100        | 100        | 83        | 83        |
| <b>AD</b>                                                                                                              | 100       | 100        | 100        | 100        | 100        | 100       | 100       |
| <b>Truncated tau TauC3</b>                                                                                             | <b>EC</b> | <b>Sub</b> | <b>CA1</b> | <b>CA2</b> | <b>CA3</b> | <b>PI</b> | <b>GI</b> |
| <b>NCI</b>                                                                                                             | 82        | 46         | 92         | 54         | 39         | 31        | 15        |
| <b>MCI</b>                                                                                                             | 80        | 50         | 83         | 50         | 50         | 33        | 33        |
| <b>AD</b>                                                                                                              | 91        | 83         | 92         | 82         | 58         | 42        | 25        |

**Supplemental table 2. Correlations between the density of TOC1, TNT1, AT8 and TauC3 in the entorhinal-hippocampal complex across clinical groups**

| p values<br>r values |     | TOC1  |              |              |              |              |              |              | TNT1  |        |        |       |       |       |       | AT8   |        |        |       |       | TauC3 |        |       |       |        |       |       |       |       |     |
|----------------------|-----|-------|--------------|--------------|--------------|--------------|--------------|--------------|-------|--------|--------|-------|-------|-------|-------|-------|--------|--------|-------|-------|-------|--------|-------|-------|--------|-------|-------|-------|-------|-----|
|                      |     | EC    | Sub          | CA1          | CA2          | CA3          | PI           | GI           | EC    | Sub    | CA1    | CA2   | CA3   | PI    | GI    | EC    | Sub    | CA1    | CA2   | CA3   | PI    | GI     | EC    | Sub   | CA1    |       |       | CA2   | CA3   | PI  |
| TOC1                 | EC  |       | <b>0.006</b> | <b>0.001</b> | <b>0.063</b> | <b>0.253</b> | <b>0.002</b> | <b>0.112</b> | 1.8*7 | 0.045  | 0.002  | 0.009 | 0.057 | 0.001 | 0.085 | 1.8*8 | 0.004  | 0.003  | 0.009 | 0.031 | 3.5*5 | 0.085  | 0.001 | 0.001 | 0.005  | 0.009 | 0.020 | 0.025 | 0.029 | EC  |
|                      | Sub | 0.563 |              | 1.4*9        | 1.7*5        | 0.059        | 0.001        | 0.003        | 0.001 | 1.1*10 | 1.5*9  | 0.001 | 0.002 | 0.004 | 0.001 | 1.6*4 | 1.0*10 | 1.3*9  | 4.6*8 | 1.1*4 | 1.2*4 | 1.3*4  | 0.044 | 1.7*5 | 1.7*6  | 1.8*4 | 0.002 | 0.315 | 0.011 | Sub |
|                      | CA1 | 0.638 | 0.858        |              | 3.6*6        | 0.099        | 2.9*4        | 0.002        | 3.8*4 | 1.4*8  | 1.8*12 | 1.1*4 | 0.011 | 0.001 | 0.001 | 2.2*5 | 3.1*11 | 1.6*16 | 1.1*6 | 0.001 | 3.3*5 | 4.3*5  | 0.007 | 4.0*6 | 1.4*8  | 5.2*7 | 0.010 | 0.029 | 0.016 | CA1 |
|                      | CA2 | 0.434 | 0.738        | 0.773        |              | 0.106        | 0.005        | 0.013        | 0.054 | 0.001  | 6.9*6  | 0.001 | 0.047 | 0.004 | 0.006 | 0.013 | 1.1*4  | 4.3*6  | 6.1*8 | 0.004 | 4.2*4 | 0.001  | 0.238 | 0.003 | 4.2*5  | 1.4*4 | 0.022 | 0.077 | 0.003 | CA2 |
|                      | CA3 | 0.261 | 0.355        | 0.312        | 0.324        |              | 0.006        | 3.6*6        | 0.485 | 0.004  | 0.166  | 0.328 | 6.4*5 | 0.249 | 1.2*6 | 0.127 | 0.009  | 0.206  | 0.160 | 3.4*6 | 0.003 | 6.9*6  | 0.754 | 0.916 | 0.763  | 0.867 | 0.016 | 0.210 | 0.030 | CA3 |
|                      | PI  | 0.633 | 0.584        | 0.625        | 0.531        | 0.501        |              | 6.3*7        | 0.006 | 0.002  | 0.003  | 0.013 | 0.001 | 0.002 | 6.7*7 | 0.004 | 0.001  | 0.002  | 4.1*5 | 0.001 | 1.1*8 | 1.5*7  | 0.144 | 0.026 | 0.006  | 0.017 | 0.046 | 0.422 | 0.327 | PI  |
|                      | GI  | 0.349 | 0.520        | 0.534        | 0.480        | 0.745        | 0.779        |              | 0.192 | 3.6*4  | 0.026  | 0.136 | 1.0*4 | 0.132 | 1.2*8 | 0.026 | 8.6*5  | 0.016  | 0.013 | 1.1*4 | 1.0*4 | 1.3*9  | 0.318 | 0.415 | 0.100  | 0.243 | 0.062 | 0.396 | 0.188 | GI  |
| TNT1                 | EC  | 0.867 | 0.647        | 0.678        | 0.436        | 0.157        | 0.571        | 0.282        |       | 0.021  | 5.0*4  | 0.029 | 0.112 | 0.013 | 0.082 | 2.0*8 | 0.006  | 0.001  | 0.011 | 0.056 | 1.7*4 | 0.059  | 3.6*4 | 1.4*4 | 0.003  | 0.002 | 0.154 | 0.016 | 0.213 | EC  |
|                      | Sub | 0.432 | 0.882        | 0.822        | 0.618        | 0.524        | 0.558        | 0.609        | 0.480 |        | 3.5*10 | 0.007 | 4.6*4 | 0.006 | 7.1*5 | 0.001 | 1.5*12 | 1.4*8  | 2.7*5 | 2.4*6 | 3.1*4 | 9.3*6  | 0.006 | 3.1*4 | 1.7*5  | 0.001 | 0.003 | 0.580 | 0.012 | Sub |
|                      | CA1 | 0.628 | 0.857        | 0.908        | 0.759        | 0.264        | 0.535        | 0.406        | 0.668 | 0.865  |        | 6.2*5 | 0.006 | 4.9*4 | 0.005 | 7.7*5 | 2.8*10 | 1.0*16 | 1.6*6 | 1.4*4 | 8.9*5 | 4.9*4  | 0.001 | 2.1*6 | 9.8*10 | 1.2*6 | 0.006 | 0.042 | 0.012 | CA1 |
|                      | CA2 | 0.598 | 0.624        | 0.698        | 0.672        | 0.209        | 0.498        | 0.313        | 0.514 | 0.522  | 0.714  |       | 0.179 | 4.5*6 | 0.093 | 7.4*4 | 3.3*4  | 5.6*5  | 1.4*5 | 0.020 | 0.001 | 0.012  | 0.022 | 7.6*5 | 7.3*5  | 5.5*5 | 0.023 | 0.016 | 0.054 | CA2 |
|                      | CA3 | 0.432 | 0.552        | 0.474        | 0.410        | 0.692        | 0.588        | 0.668        | 0.358 | 0.618  | 0.504  | 0.290 |       | 0.014 | 1.2*4 | 0.012 | 8.5*4  | 0.011  | 0.028 | 2.4*8 | 0.001 | 1.1*5  | 0.188 | 0.317 | 0.194  | 0.459 | 0.004 | 0.569 | 0.004 | CA3 |
|                      | PI  | 0.704 | 0.568        | 0.653        | 0.588        | 0.245        | 0.603        | 0.316        | 0.573 | 0.542  | 0.656  | 0.801 | 0.517 |       | 0.080 | 0.007 | 9.7*4  | 0.001  | 7.2*5 | 0.001 | 3.0*6 | 0.016  | 0.015 | 0.001 | 0.001  | 0.001 | 0.020 | 0.005 | 0.112 | PI  |
|                      | GI  | 0.375 | 0.596        | 0.562        | 0.526        | 0.767        | 0.778        | 0.833        | 0.370 | 0.652  | 0.491  | 0.343 | 0.664 | 0.364 |       | 0.051 | 8.4*5  | 0.008  | 0.002 | 1.3*5 | 3.3*6 | 4.2*12 | 0.612 | 0.148 | 0.098  | 0.109 | 0.007 | 0.812 | 0.031 | GI  |
| AT8                  | EC  | 0.896 | 0.675        | 0.722        | 0.512        | 0.313        | 0.555        | 0.436        | 0.885 | 0.593  | 0.686  | 0.665 | 0.505 | 0.566 | 0.380 |       | 6.5*5  | 5.1*5  | 0.003 | 0.005 | 0.001 | 0.006  | 1.0*5 | 9.8*5 | 0.001  | 0.001 | 0.016 | 0.020 | 0.054 | EC  |
|                      | Sub | 0.592 | 0.883        | 0.887        | 0.686        | 0.477        | 0.578        | 0.655        | 0.552 | 0.909  | 0.867  | 0.660 | 0.595 | 0.630 | 0.647 | 0.692 |        | 5.8*10 | 8.6*5 | 2.5*5 | 4.7*5 | 4.6*6  | 0.002 | 7.4*5 | 4.1*6  | 3.1*4 | 0.008 | 0.205 | 0.012 | Sub |
|                      | CA1 | 0.609 | 0.859        | 0.953        | 0.770        | 0.242        | 0.559        | 0.436        | 0.659 | 0.822  | 0.954  | 0.717 | 0.471 | 0.637 | 0.466 | 0.699 | 0.860  |        | 3.1*6 | 0.001 | 4.2*4 | 0.001  | 0.004 | 8.5*7 | 1.1*11 | 5.2*7 | 0.008 | 0.061 | 0.024 | CA1 |
|                      | CA2 | 0.553 | 0.830        | 0.778        | 0.853        | 0.278        | 0.704        | 0.462        | 0.529 | 0.706  | 0.770  | 0.764 | 0.431 | 0.721 | 0.557 | 0.564 | 0.673  | 0.76   |       | 0.001 | 5.7*7 | 2.4*4  | 0.132 | 4.0*5 | 3.1*6  | 1.3*6 | 0.003 | 0.059 | 0.005 | CA2 |
|                      | CA3 | 0.461 | 0.646        | 0.566        | 0.545        | 0.746        | 0.571        | 0.646        | 0.405 | 0.745  | 0.639  | 0.475 | 0.839 | 0.617 | 0.707 | 0.536 | 0.690  | 0.567  | 0.598 |       | 2.6*5 | 1.3*5  | 0.087 | 0.048 | 0.014  | 0.096 | 9.3*7 | 0.686 | 0.017 | CA3 |
|                      | PI  | 0.764 | 0.645        | 0.674        | 0.641        | 0.528        | 0.842        | 0.650        | 0.705 | 0.605  | 0.645  | 0.640 | 0.577 | 0.798 | 0.729 | 0.609 | 0.664  | 0.595  | 0.790 | 0.689 |       | 1.6*7  | 0.038 | 0.004 | 0.001  | 0.002 | 0.024 | 0.038 | 0.026 | PI  |
|                      | GI  | 0.375 | 0.643        | 0.666        | 0.611        | 0.730        | 0.804        | 0.858        | 0.399 | 0.705  | 0.589  | 0.494 | 0.730 | 0.488 | 0.902 | 0.518 | 0.722  | 0.556  | 0.641 | 0.705 | 0.786 |        | 0.194 | 0.078 | 0.048  | 0.028 | 0.052 | 0.881 | 0.014 | GI  |
| TauC3                | EC  | 0.676 | 0.398        | 0.507        | 0.256        | 0.066        | 0.301        | 0.204        | 0.680 | 0.513  | 0.617  | 0.487 | 0.278 | 0.525 | 0.102 | 0.761 | 0.566  | 0.533  | 0.310 | 0.342 | 0.401 | 0.258  |       | 0.002 | 0.005  | 0.009 | 0.378 | 0.046 | 0.228 | EC  |
|                      | Sub | 0.655 | 0.699        | 0.725        | 0.556        | -0.02        | 0.413        | 0.155        | 0.713 | 0.605  | 0.738  | 0.708 | 0.196 | 0.650 | 0.266 | 0.679 | 0.651  | 0.757  | 0.696 | 0.364 | 0.506 | 0.321  | 0.558 |       | 5.3*10 | 2.6*8 | 0.037 | 0.008 | 0.055 | Sub |
|                      | CA1 | 0.576 | 0.751        | 0.822        | 0.714        | 0.059        | 0.497        | 0.306        | 0.586 | 0.691  | 0.854  | 0.709 | 0.253 | 0.638 | 0.302 | 0.606 | 0.724  | 0.895  | 0.757 | 0.443 | 0.550 | 0.358  | 0.525 | 0.861 |        | 1.4*7 | 0.032 | 0.052 | 0.105 | CA1 |
|                      | CA2 | 0.542 | 0.642        | 0.774        | 0.679        | 0.033        | 0.449        | 0.224        | 0.610 | 0.595  | 0.759  | 0.717 | 0.149 | 0.635 | 0.298 | 0.591 | 0.613  | 0.774  | 0.775 | 0.315 | 0.542 | 0.401  | 0.496 | 0.822 | 0.797  |       | 0.123 | 0.008 | 0.124 | CA2 |
|                      | CA3 | 0.491 | 0.534        | 0.458        | 0.448        | 0.442        | 0.373        | 0.345        | 0.307 | 0.516  | 0.485  | 0.452 | 0.532 | 0.471 | 0.475 | 0.461 | 0.466  | 0.471  | 0.541 | 0.763 | 0.404 | 0.352  | 0.177 | 0.377 | 0.387  | 0.288 |       | 0.318 | 0.007 | CA3 |
|                      | PI  | 0.476 | 0.190        | 0.393        | 0.353        | -0.24        | 0.155        | -0.16        | 0.497 | 0.103  | 0.368  | 0.475 | -0.11 | 0.557 | -0.05 | 0.446 | 0.234  | 0.340  | 0.362 | 0.077 | 0.374 | 0.028  | 0.388 | 0.469 | 0.353  | 0.475 | 0.185 |       | 0.922 | PI  |
|                      | GI  | 0.466 | 0.456        | 0.428        | 0.565        | 0.403        | 0.189        | 0.247        | 0.270 | 0.445  | 0.445  | 0.391 | 0.530 | 0.333 | 0.389 | 0.375 | 0.447  | 0.406  | 0.513 | 0.433 | 0.399 | 0.439  | 0.240 | 0.349 | 0.296  | 0.287 | 0.472 | 0.018 |       | GI  |

\* = x10<sup>-4</sup>; Gray-shaded area = Spearman correlation coefficient (r) values; Non-shaded area = p values; Bonferroni adjusted correlations: α=0.03.

# Supplemental Figure 1

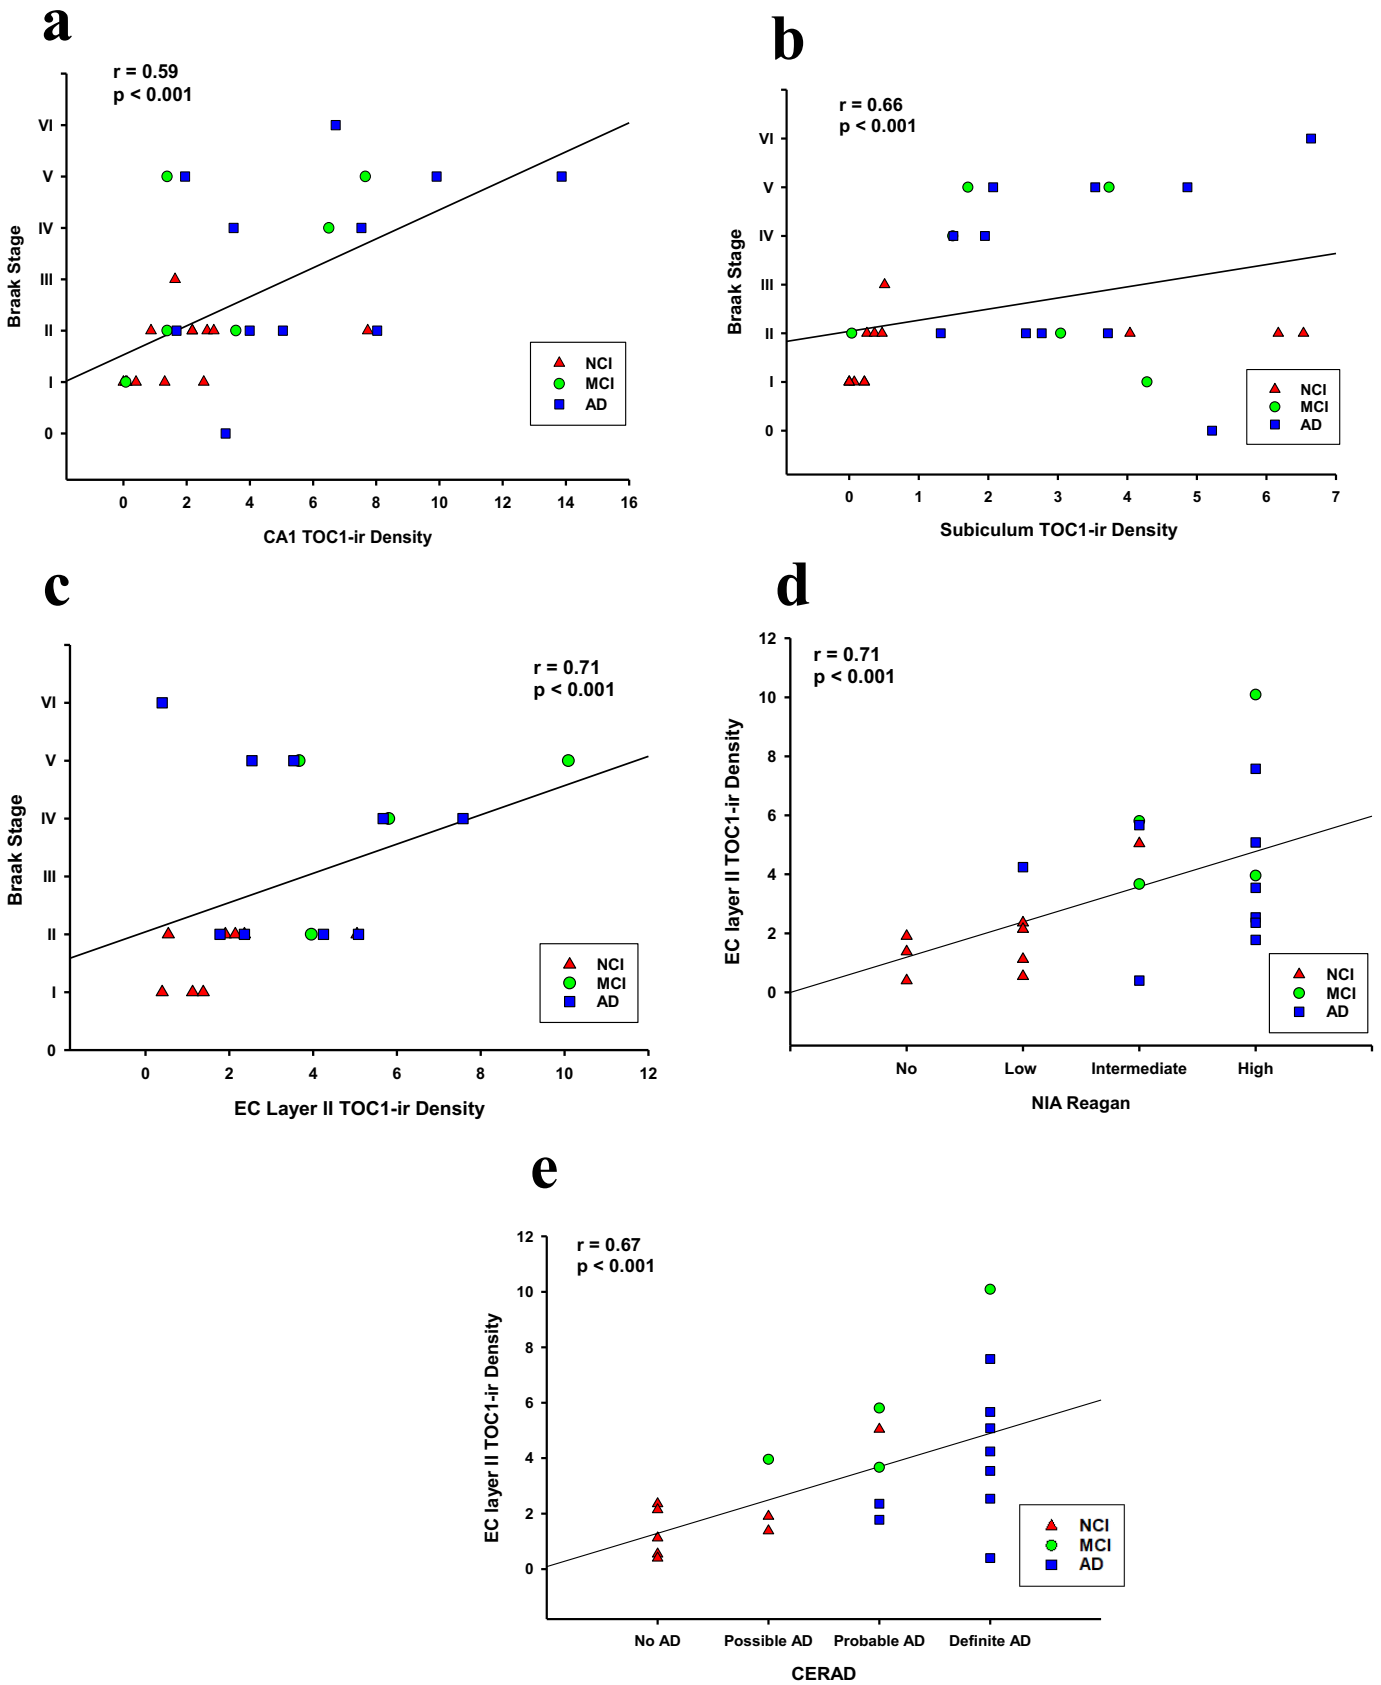

## Supplemental Figure 2

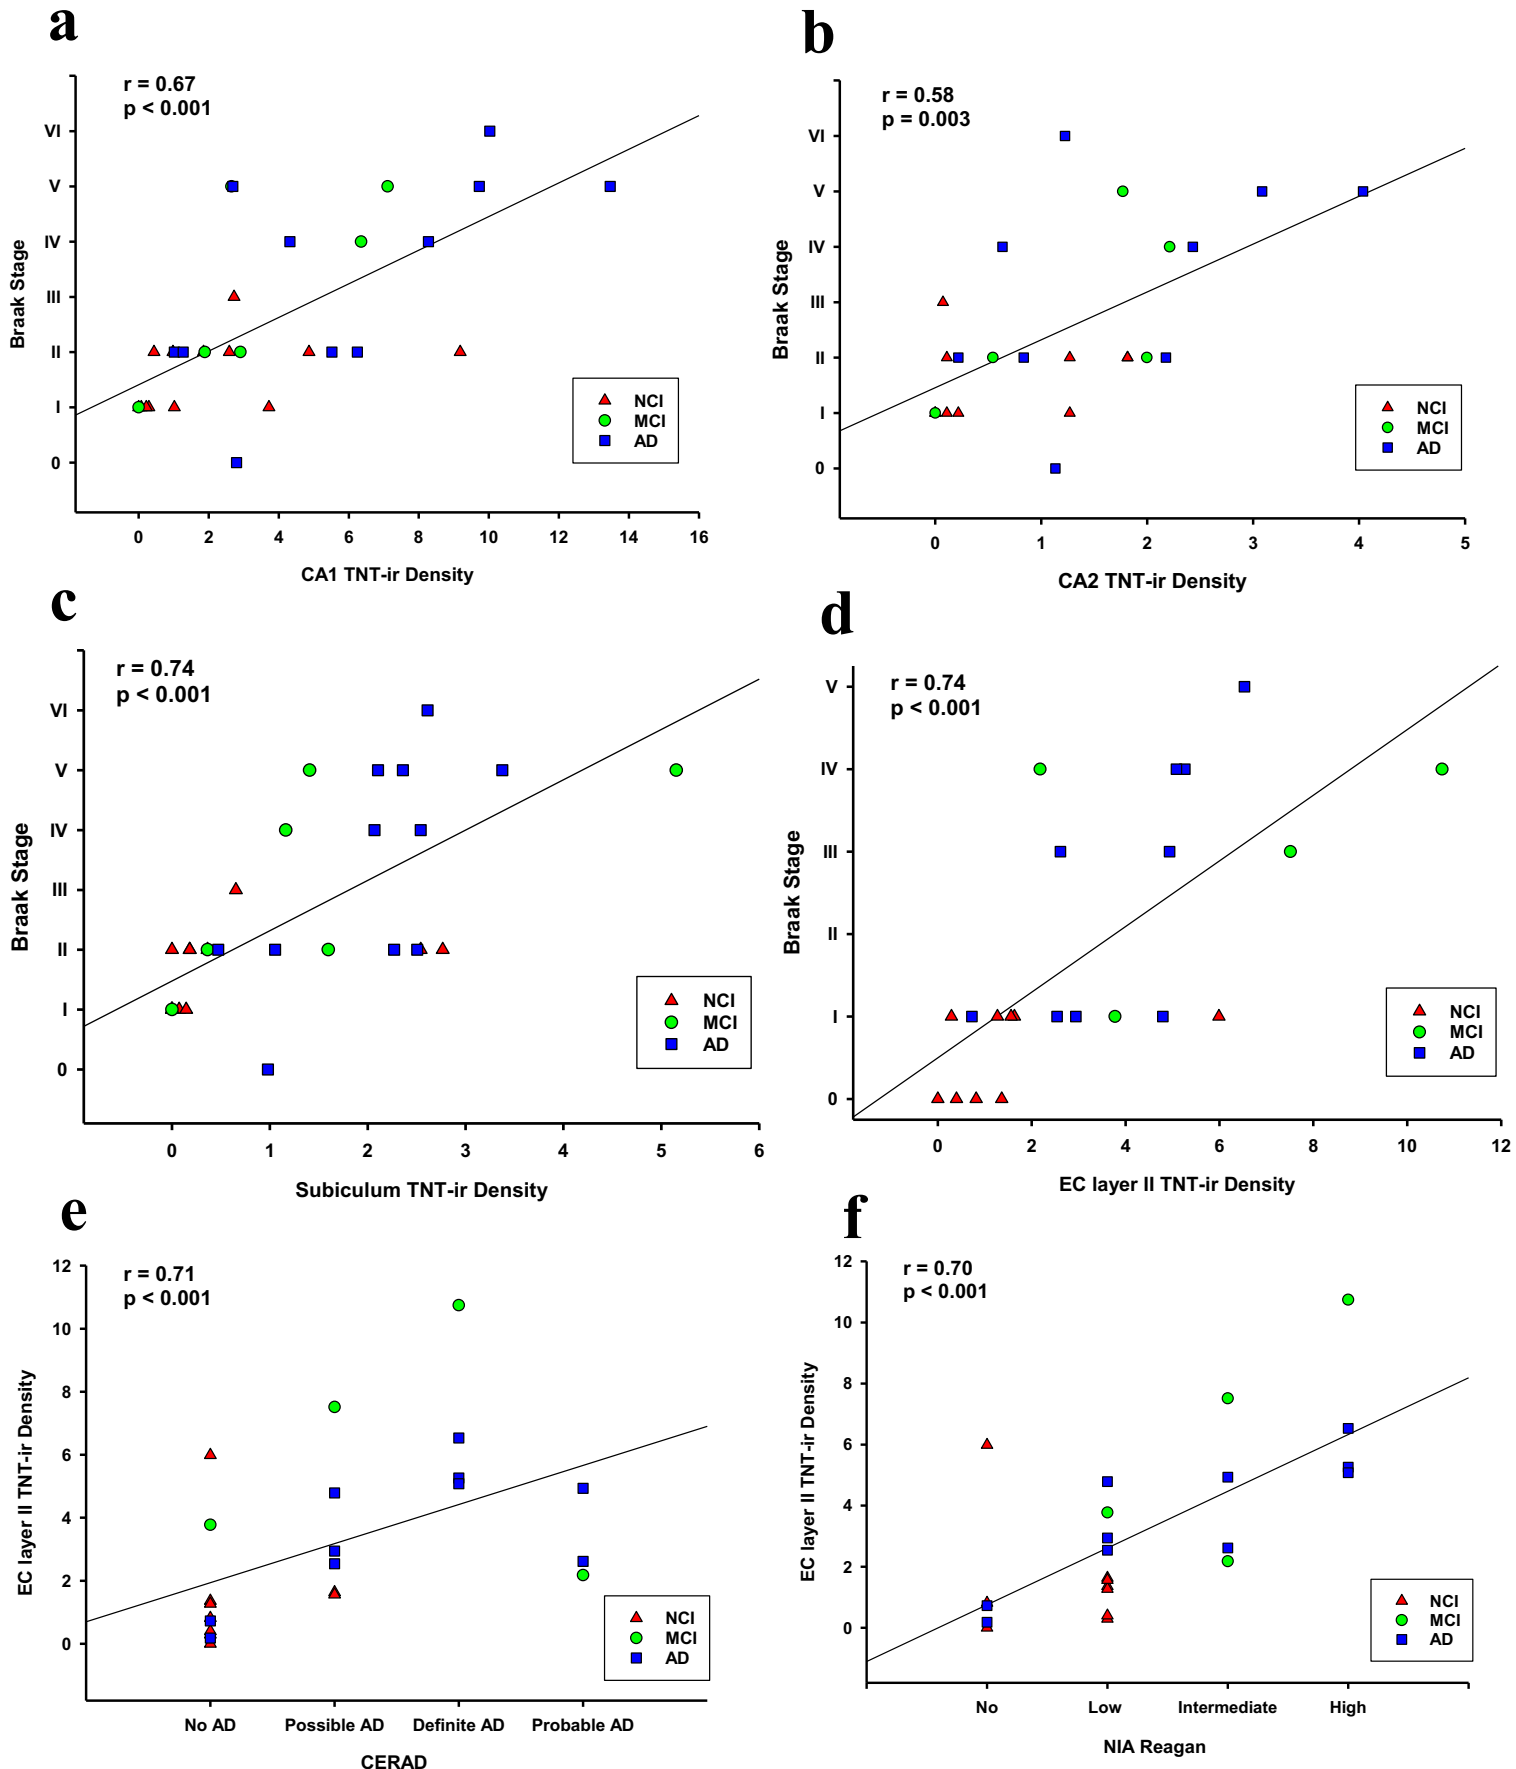

## Supplemental Figure 3

**a**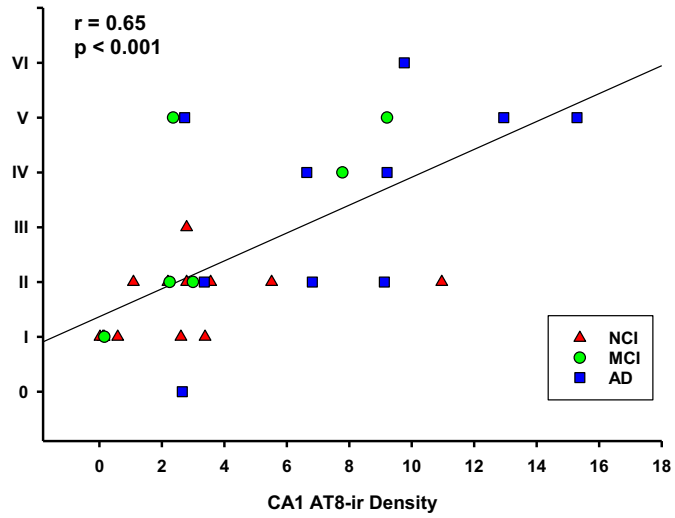**b**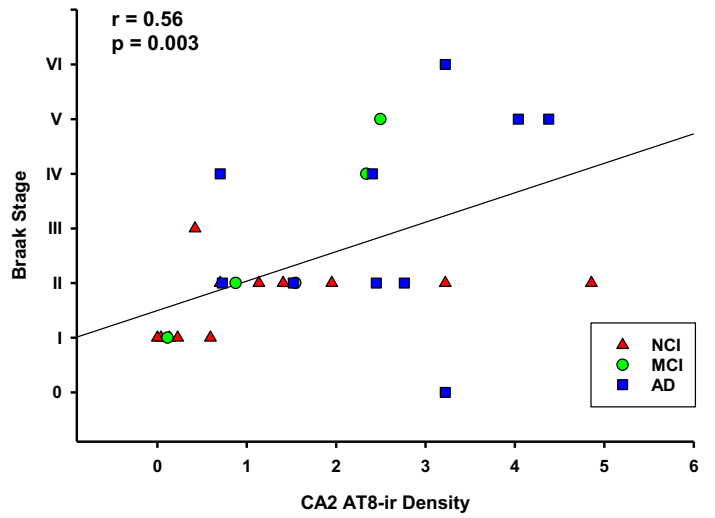**c**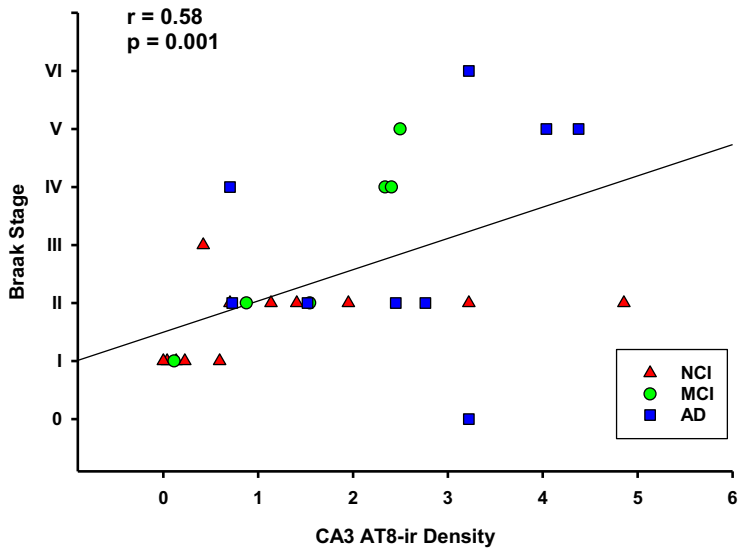**d**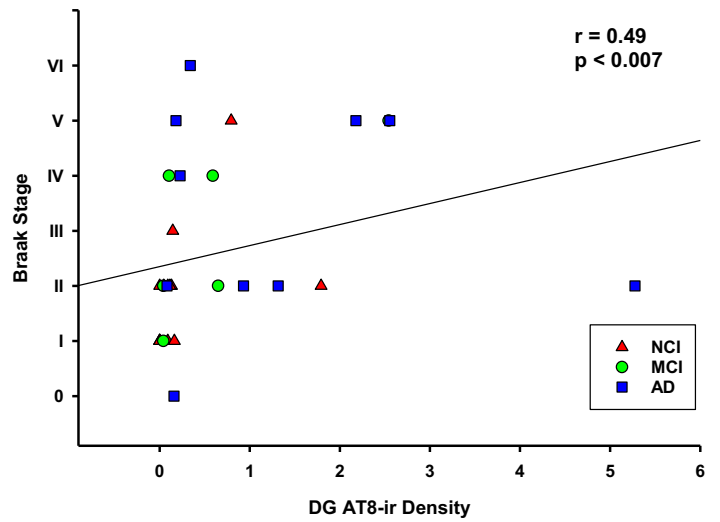**e**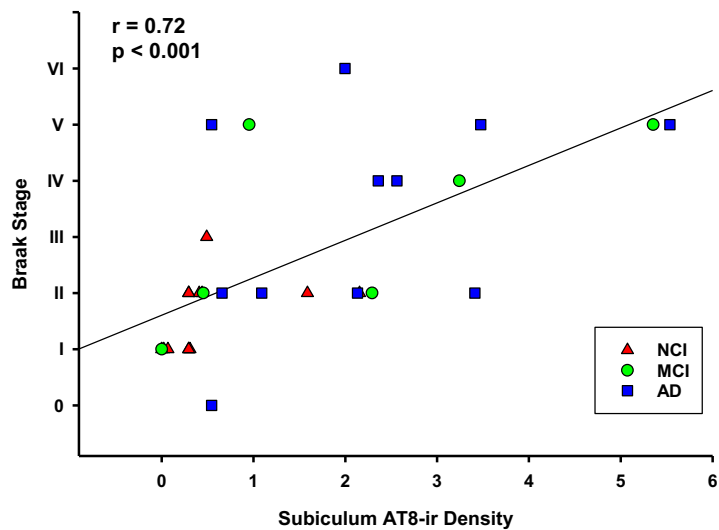**f**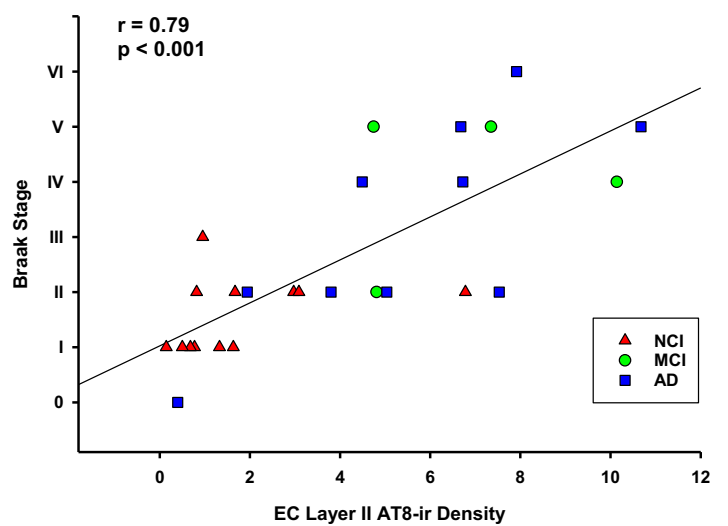

## Supplemental Figure 4

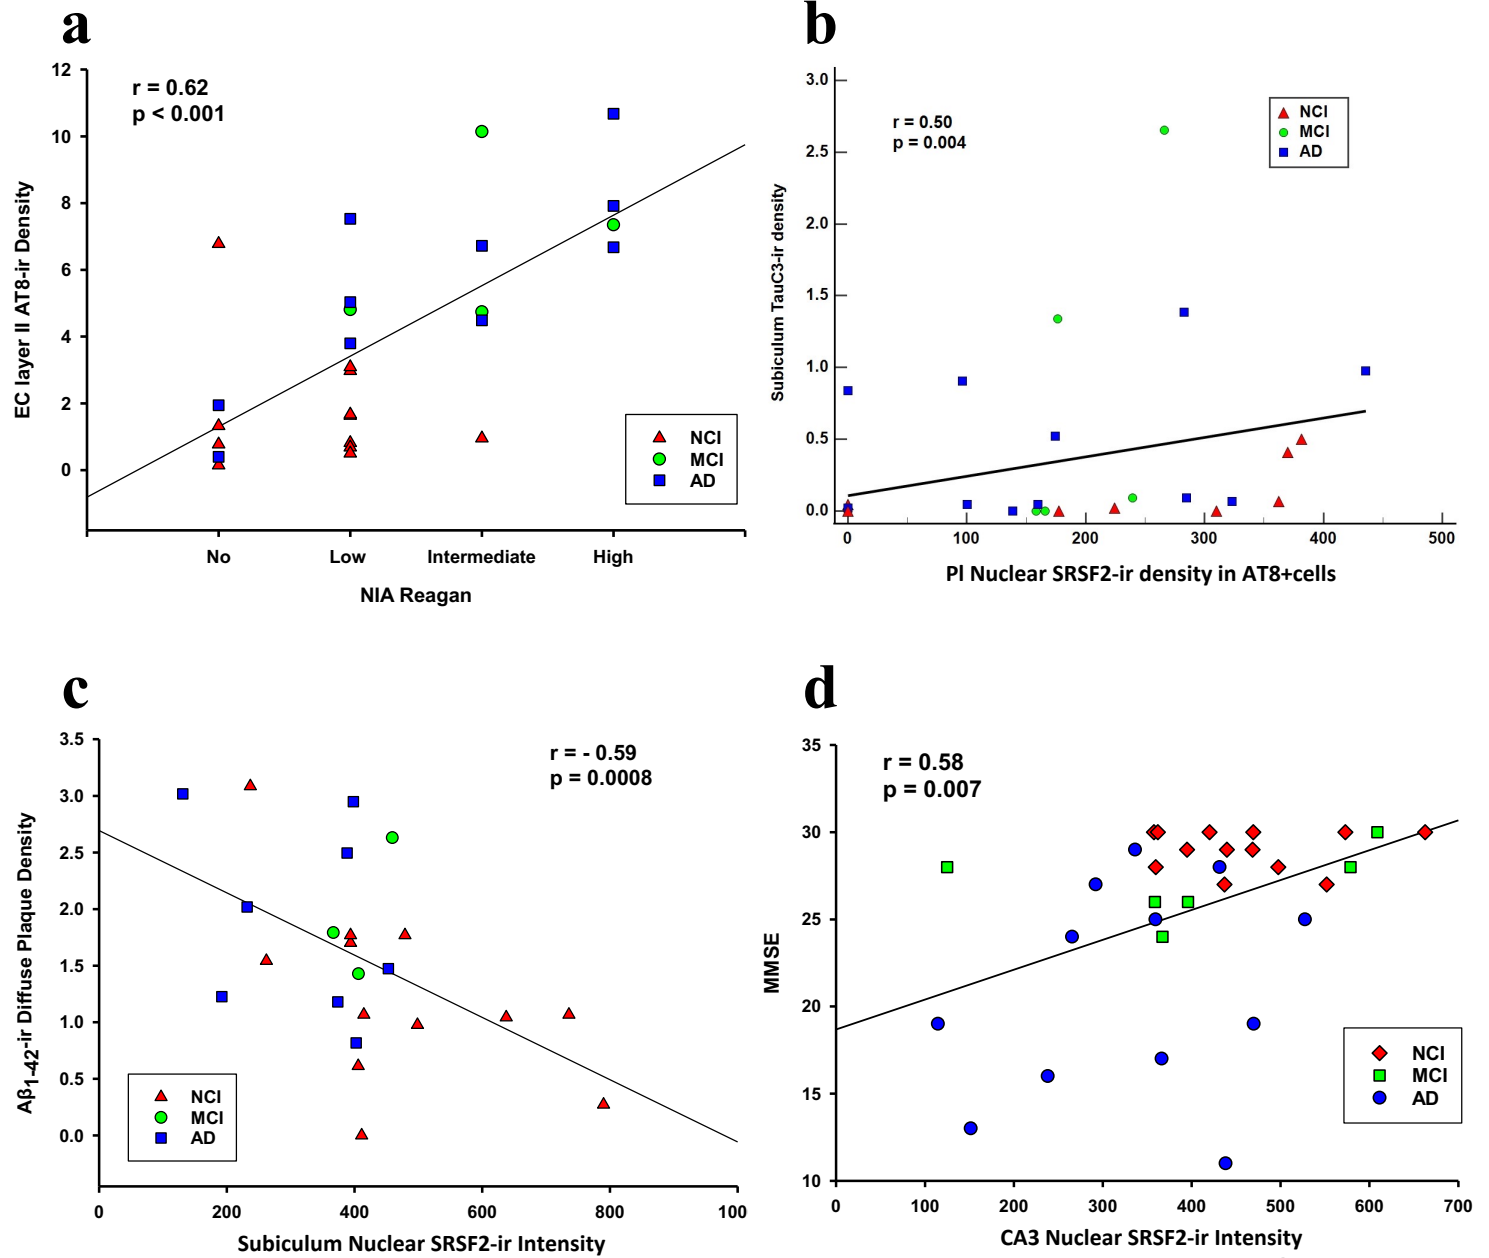

Supplement: NIHMS1873097-supplement-1.pdf [file NIHMS1873097-supplement-1.pdf]
